# Supplementary material for: Oral Immunization of Larvae and Juvenile of Lumpfish (Cyclopterus lumpus) against Vibrio anguillarum Does Not Influence Systemic Immunity
Source: MDPI journal article supplement (doi:10.3390/vaccines9080819), 2021-07-23
Supplement: s1 [file s1]

**Table S1. Sequences of primer pairs used in qPCR analyses of transcript expression levels in lumpfish (*Cyclopterus lumpus*) larvae.**

| Gene name (symbol) <sup>a</sup>                                     | Trinity ID from NCBI SRA acc. no. SRP238224 | Nucleotide sequence (5'-3')                           | Amplicon Size (bp) | Efficiency (%) |
|---------------------------------------------------------------------|---------------------------------------------|-------------------------------------------------------|--------------------|----------------|
| C-C motif chemokine-like 19 ( <i>ccl19</i> )                        | DN10492_c0_g1_i4                            | F: GCTCAGGTACCAACGGACTG<br>R: CGTGTCTCCGATCTGTCTC     | 94                 | 94.33          |
| cyclooxygenase-2 ( <i>cox2</i> )                                    | DN750_c1_g1_i1                              | F: GAATTCCTCACCTGGGTCAA<br>R: ATGGCATCTCTGAGGAAGGA    | 122                | 99.18          |
| hepcidin anti-microbial peptide ( <i>hamp</i> )                     | DN2993_c0_g1_i4                             | F: GCTCGCCTTTATTTGCATTC<br>R: ATATGCCGCAACTGGAGTGT    | 100                | 93.36          |
| interleukin 8_a ( <i>il8a</i> )                                     | DN21169_c0_g1_i2                            | F: AAGTCATAGCCGGACTGTCG<br>R: CCCTGCTGATGGAGTTGTCT    | 109                | 100.39         |
| interleukin 8_b ( <i>il8b</i> )                                     | DN4613_c0_g1_i4                             | F: GTCTGAGAAGCCTGGGAGTG<br>R: TCAGAGTGGCAATGATCTCG    | 138                | 98.15          |
| interleukin 10 ( <i>il10</i> )                                      | DN41536_c0_g1_i1                            | F: AACCAGTGCTGTCGTTTCGT<br>R: TGTCCAAGTCATCGTTTGCT    | 106                | 95.24          |
| ATP-dependent RNA helicase lgp2 ( <i>lgp2</i> )                     | DN49186_c0_g1_i1                            | F: GCAACCTGGTGGTACGCTAT<br>R: CTCGGCGACCACTGAATACT    | 104                | 81.54          |
| interferon-induced GTP-binding protein_a ( <i>mxα</i> )             | DN526_c0_g1_i6                              | F: TGCACAGACTCAAGCAGAGC<br>R: CCACACTTGAGCTCCTCTCC    | 144                | 85.43          |
| interferon-induced GTP-binding protein_b ( <i>mxβ</i> )             | DN526_c0_g1_i3                              | F: TTGCGGCTTGGA AAAAATATC<br>R: TCCACGGTACCTTCGTTTCAT | 95                 | 92.78          |
| interferon-induced GTP-binding protein_c ( <i>mxγ</i> )             | DN237_c1_g1_i1                              | F: GGAAGTGGCAGACATTGTGA<br>R: CTGCTGCAATCTCCTTCTCC    | 131                | 90.70          |
| signal transducer and activator of transcription 1 ( <i>stat1</i> ) | DN3250_c2_g1_i2                             | F: CTCAAGATGCTGGACTGCAA<br>R: ATGCTCTCGATCCACTTGCT    | 104                | 84.99          |
| toll-like receptor 3 ( <i>tlr3</i> )                                | DN30532_c0_g1_i1                            | F: AGAGGGCAGGGAATTTGAGT<br>R: TGCACGAGTCATTCTCCAAG    | 101                | 90.29          |

|                                                                               |                  |                                                        |     |       |
|-------------------------------------------------------------------------------|------------------|--------------------------------------------------------|-----|-------|
| C-C motif chemokine-like 20 ( <i>ccl20</i> )                                  | DN9266_c0_g1_i3  | F: ATGGGCTACACCATCCAGAC<br>R: CCACTTGGATGAAGGGTCAG     | 102 | 80.07 |
| immunoglobulin heavy chain variable region a ( <i>igha</i> )                  | DN1665_c0_g3_i2  | F: AGGACTGGAGTGGATTGGAA<br>R: TGCATGGTCTGTCCGTTTAG     | 129 | 91.00 |
| immunoglobulin heavy chain_b ( <i>ighb</i> )                                  | DN1665_c0_g4_i1  | F: GAATGGAACAAGGGGACAAA<br>R: CGGTCGTTGAGTCTCTCCTC     | 108 | 90.60 |
| interferon regulatory factor 7 ( <i>irf7</i> )                                | DN6933_c0_g1_i2  | F: GGCTCATAGAGCAGGTGGAG<br>R: CTGTCTTCGTCGTTGCAGTC     | 115 | 81.89 |
| HLA class II histocompatibility antigen gamma chain ( <i>cd74</i> )           | DN13708_c0_g1_i6 | F: ACGCCAAGACACCTCTGACT<br>R: GGAAGGTCTCGTTGAACTGC     | 108 | 96.45 |
| serum amyloid A 5 ( <i>saa5</i> )                                             | DN41536_c0_g1_i1 | F: AGAGTGGGTGCAGGAAAGAA<br>R: GAAGTCCTGGTGGCCTGTAA     | 116 | 95.9  |
| T-cell surface glycoprotein CD4_a ( <i>cd4a</i> ) <sup>c</sup>                | DN9678_c0_g2_i9  | F: CGTTAAGGTGCTGCAGATCA<br>R: GCGGAAACCATTTCAGTTGT     | 122 | 84.85 |
| T-cell surface glycoprotein CD4_b ( <i>cd4b</i> ) <sup>c</sup>                | DN24146_c0_g1_i7 | F: TGTGGGGTTAGCTCCTTCAC<br>R: TGTTTGCATCTCACCTTTG      | 138 | 94.24 |
| interleukin 1 beta ( <i>il1b</i> ) <sup>c</sup>                               | DN22448_c0_g2_i1 | F: ATTGTGTTTCGAGCTCGGTTTC<br>R: CGAACTATGGTCCGCTTCTC   | 98  | 97.37 |
| toll-like receptor 5_a ( <i>tlr5a</i> ) <sup>c</sup>                          | DN29432_c0_g1_i1 | F: TGGACGAGTTTCAGCAGTTG<br>R: AGACCCCTCACATGTCCAAG     | 129 | 95.58 |
| toll-like receptor 5_b ( <i>tlr5b</i> ) <sup>c</sup>                          | DN55824_c0_g1_i5 | F: CCATCATGCACCTTTGTACGG<br>R: TGCTGTTGATCTCCCTGATG    | 127 | 88.57 |
| tumour necrosis factor alpha ( <i>tfa</i> ) <sup>c</sup>                      | DN26791_c0_g1_i1 | F: TTAGAAGGGAGCTGCGAAGA<br>R: ATGACGATCCGGTTGTTCTC     | 119 | 90.06 |
| lymphocyte antigen 6 complex locus protein G6f ( <i>ly6g6f</i> ) <sup>c</sup> | DN12606_c0_g1_i8 | F: TCCATGTGGACGTGACTGTT<br>R: AACGGTGTCTGAGCCTGAGT     | 100 | 88.17 |
| T-cell surface glycoprotein CD8 alpha chain ( <i>cd8a</i> ) <sup>c</sup>      | DN11791_c0_g1_i1 | F: GCTTTGCTCTCTGGGCATAC<br>R: TCCGGGTTCTTAAGTGGTTG     | 104 | 89.62 |
| immunoglobulin mu heavy chain_a ( <i>ighma</i> ) <sup>c</sup>                 | DN121_c0_g3_i3   | F: CAGCTTCTGGATTAGACTTTGA<br>R: GATGTTGTTACTGTTGTGTTGG | 107 | 90.17 |
| immunoglobulin mu heavy chain_c ( <i>ighmc</i> ) <sup>c</sup>                 | DN121_c0_g3_i4   | F: CAACATCCGGAATCACATTCAG<br>R: GATTTTGAGGTCCCACTACCAT | 112 | 87.68 |

|                                                                                                   |                                     |                                                     |     |        |
|---------------------------------------------------------------------------------------------------|-------------------------------------|-----------------------------------------------------|-----|--------|
| interferon gamma ( <i>ifng</i> ) <sup>c</sup>                                                     | DN81754_c0_g1_i1                    | F: CTCTGGCTGGTTGTCTGTCA<br>R: TCGCTCTCTCGATGGAATCT  | 105 | 90.75  |
| immunoglobulin delta heavy chain ( <i>ighd</i> ) <sup>c</sup>                                     | DN1665_c0_g2_i7                     | F: GGAGACAGTGTGTGCTGGA<br>R: GGGCTTCAGGAAATCAACA    | 121 | 88.41  |
| toll-like receptor 7 ( <i>tlr7</i> ) <sup>c</sup>                                                 | DN760_c1_g2_i1                      | F: GGCAAACCTGGAAGAATTGGA<br>R: GAAGGGATTTGAGGGAGGAG | 100 | 90.55  |
| radical S-adenosyl methionine domain containing protein 2 / viperin ( <i>rsad2</i> ) <sup>c</sup> | DN16769_c0_g1_i1                    | F: AGGAGAGGGTGAAGGGAGAG<br>R: ATCCAGAGGCAGGACAAATG  | 133 | 98.47  |
| <b>Normaliser<sup>b</sup></b>                                                                     |                                     |                                                     |     |        |
| eukaryotic translation initiation factor 3 subunit D ( <i>etif3d</i> )                            | DN7623_c0_g1_i5                     | F: AGCCAGATCAACCTGAGCAT<br>R: AGGCTGTACACCCGAATCAC  | 134 | 86.49  |
| 60S ribosomal protein L32 ( <i>rpl32</i> )                                                        | DN3569_c0_g1_i2                     | F: GTAAGCCCAGGGGTATCGAC<br>R: GGGCAGCATGTACTTGGTCT  | 107 | 80.08  |
| elongation factor 1 alpha_a ( <i>ef1a_a</i> )                                                     | DN12280_c0_g1_i3                    | F: CAAGGGATGGAAGATTGAGC<br>R: TGTTCCGATACCTCCGATTT  | 151 | 83.81  |
| elongation factor 1 alpha_c ( <i>ef1a_c</i> )                                                     | DN12280_c0_g1_i4                    | F: AAGCGCTTTGAGGAAATCACC<br>R: GCTCGACCTTCCAACCTTG  | 160 | *95.60 |
| polyadenylate-binding protein 1_a ( <i>pabpc1_a</i> )                                             | DN6565_c0_g2_i3,<br>DN6565_c0_g2_i4 | F: CAAGAACTTTGGGGAGGACA<br>R: TGACAAAGCCAAATCCCTTC  | 125 | 84.76  |
| polyadenylate-binding protein 1_b ( <i>pabpc1_b</i> )                                             | DN6565_c0_g2_i5                     | F: GACTCAGGAGGCAGCTGAAC<br>R: TCGCGCTCTTTACGAGATTT  | 102 | 88.11  |

\*4-pt standard curve

<sup>a</sup>Expression levels of the transcripts of interest were normalized to expression levels of these two transcripts.

<sup>b</sup>Candidate endogenous control transcripts

<sup>c</sup>Expression levels of these transcripts were low in lumpfish larvae; efficiencies are those reported for lumpfish head kidney (Gnanagobal et al., submitted).
