# Supplementary material for: Oral Immunization of Larvae and Juvenile of Lumpfish (Cyclopterus lumpus) against Vibrio anguillarum Does Not Influence Systemic Immunity
Source: MDPI journal article supplement (doi:10.3390/vaccines9080819), 2021-07-23
Supplement: s1 [file s1]

Supplementary figures

# Oral Immunization of Larvae and Juvenile of Lumpfish (*Cyclopterus lumpus*) against *Vibrio anguillarum* Does Not Influence Systemic Immunity

My Dang <sup>1</sup>, Trung Cao <sup>1</sup>, Ignacio Vasquez <sup>1</sup>, Ahmed Hossain <sup>1</sup>, Hajarrooba Gnanagobal <sup>1</sup>, Surendra Kumar <sup>2</sup>, Jennifer R. Hall <sup>3</sup>, Jennifer Monk <sup>4</sup>, Danny Boyce <sup>4</sup>, Jillian Westcott <sup>5</sup> and Javier Santander <sup>1,\*</sup>

<sup>1</sup> Marine Microbial Pathogenesis and Vaccinology Laboratory, Department of Ocean Sciences, Memorial University of Newfoundland, St. John's, A1C 5S7, NL, Canada; tmt dang@mun.ca (M.D.); ttcao@mun.ca (T.C.); ivasquezsoli@mun.ca (I.V.); ahossain@mun.ca (A.H.); hg nanagobal@mun.ca (H.G.)

<sup>2</sup> Ocean Frontier Institute, Department of Ocean Sciences, Memorial University of Newfoundland, St. John's, A1C 5S7, NL, Canada; surendrak@mun.ca

<sup>3</sup> Aquatic Research Cluster, CREAT Network, Department of Ocean Sciences, Memorial University of Newfoundland, St. John's, A1C 5S7, NL, Canada; jrhall@mun.ca

<sup>4</sup> Dr. Joe Brown Aquatic Research Building (JBARB), Memorial University of Newfoundland, St. John's, A1C 5S7, NL, Canada; jmonk@mun.ca (J.M.); dboyce@mun.ca (D.B.)

<sup>5</sup> Fisheries and Marine Institute of Memorial University of Newfoundland, St. John's, A1C 5S7, NL, Canada; jillian.westcott@mi.mun.ca

\* Correspondence: jsantander@mun.ca; Tel.: +1-709-8643268

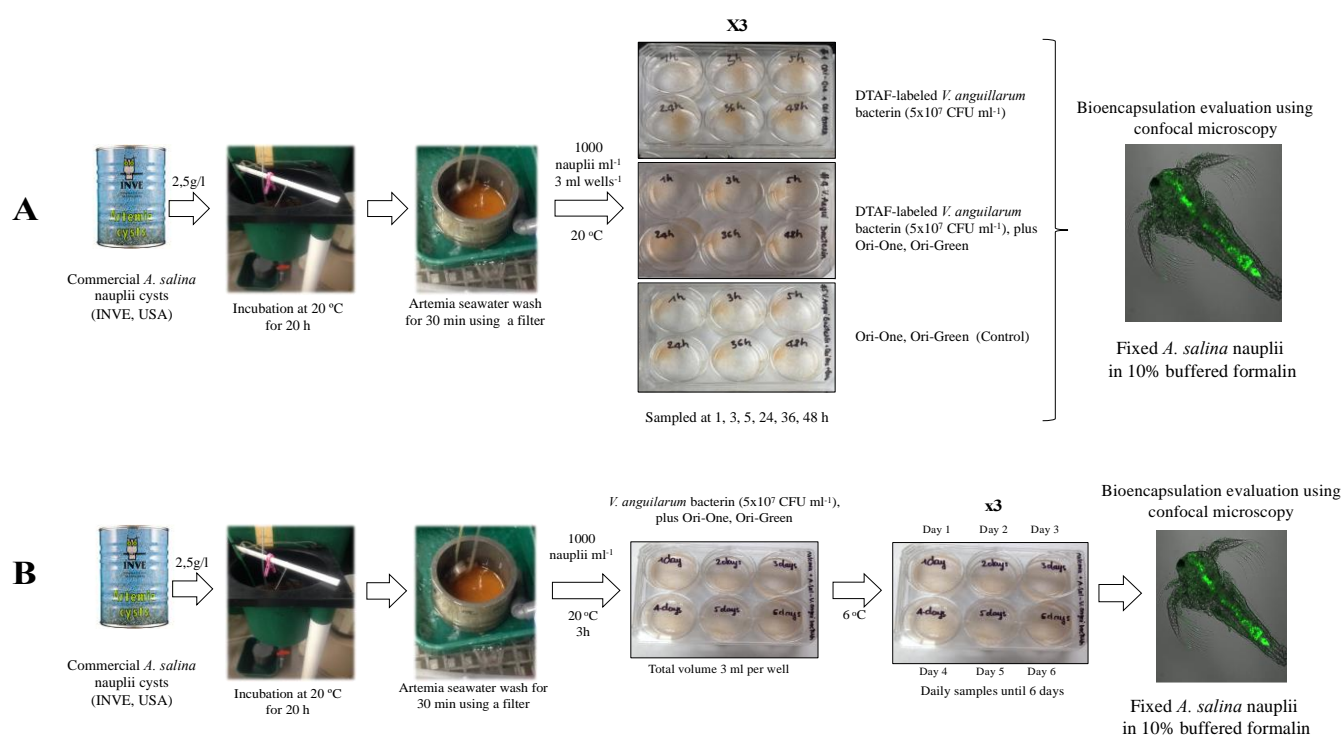

**Figure S1. Experimental design for optimization of *V. anguillarum* bacterin bio-encapsulation in *A. salina* nauplii.** (A) **Optimization of bio-encapsulation conditions and time.** The effects of supplementation with Ori-One and Ori-Green on *V. anguillarum* bacterin bio-encapsulation in *A. salina* were assessed. In addition, to determine the optimal incubation time for bio-encapsulation to occur, incubations were performed at 20 °C for either 1, 3, 5, 24, 36 or 48 h post-inoculation. The presence of the *V. anguillarum* bacterin in the *A. salina* intestine was then assessed using confocal microscopy. (B) **The stability of the *V. anguillarum* bacterin in the intestine of *A. salina* nauplii post bio-encapsulation.** Once the bio-encapsulation process was completed under the optimal conditions determined in (A), *A. salina* containing the *V. anguillarum* bacterin were stored at 6 °C. The presence of the *V. anguillarum* bacterin in the *A. salina* intestine was then assessed daily for 6 days using confocal microscopy.

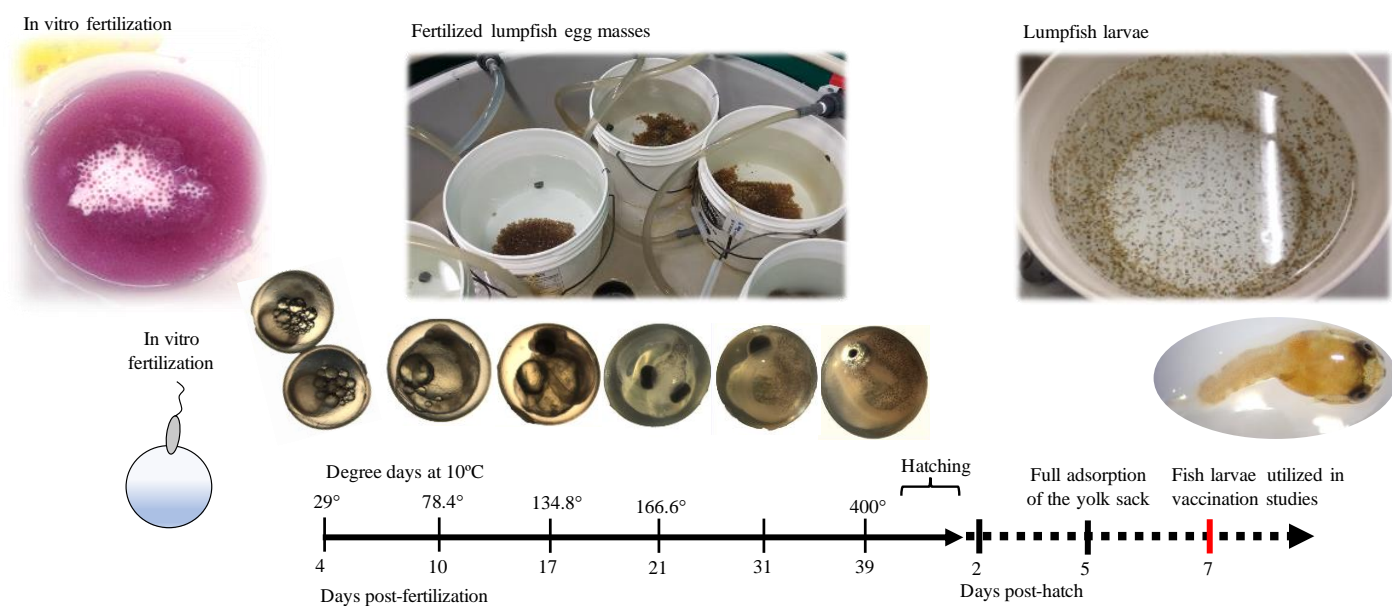

**Figure S2. Lumpfish culture conditions and embryonic development.** Fertilized lumpfish egg masses were maintained in 5 l buckets (see section 1.7 for details) during embryonic development: **(A)** Segmentation and compression of yolk lipids; **(B)** Embryo with oocysts and more developed eyes; **(C)** Eye pigmentation and otoliths; **(D)** Skin pigmentation; **(E)** The embryo's body; **(F)** Large embryo ready to hatch. At 7 dph, the larvae were subjected to vaccination studies.

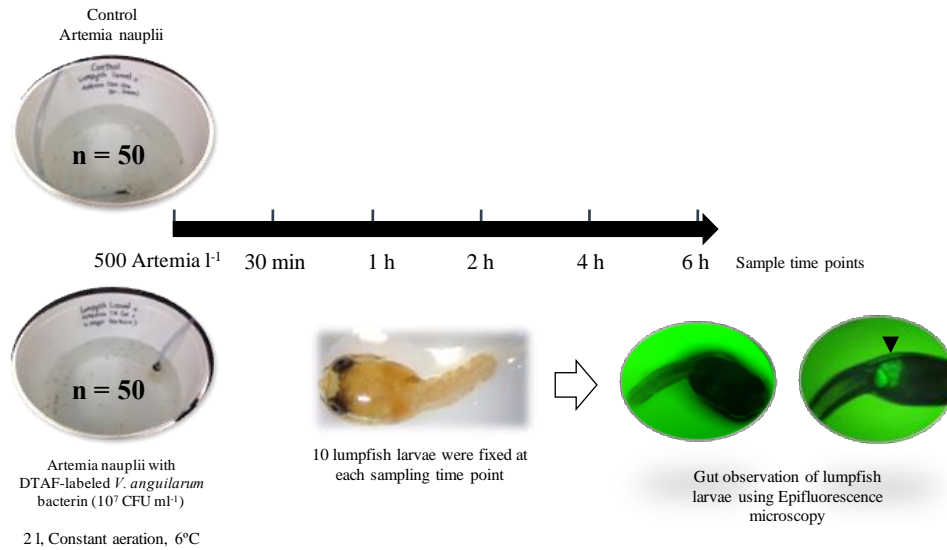

**Figure S3. Oral immunization of lumpfish larvae with the DTAF-labeled *V. anguillarum* bacterin bio-encapsulated in *Artemia* nauplii.** Lumpfish larvae (7 dph) were either fed *Artemia* nauplii with the bio-encapsulated DTAF-labeled *V. anguillarum* bacterin or control *Artemia* nauplii that had been inoculated with seawater, and maintained at 6 °C for 12 h. The presence of *V. anguillarum* bacterin in the gut of lumpfish larvae compared to non-orally immunized fish was then assessed at 0, 0.5, 1, 2, 4, and 6 h post-oral immunization by fluorescence microscopy. The arrow indicates the presence of green-fluorescent *V. anguillarum* bacterin.

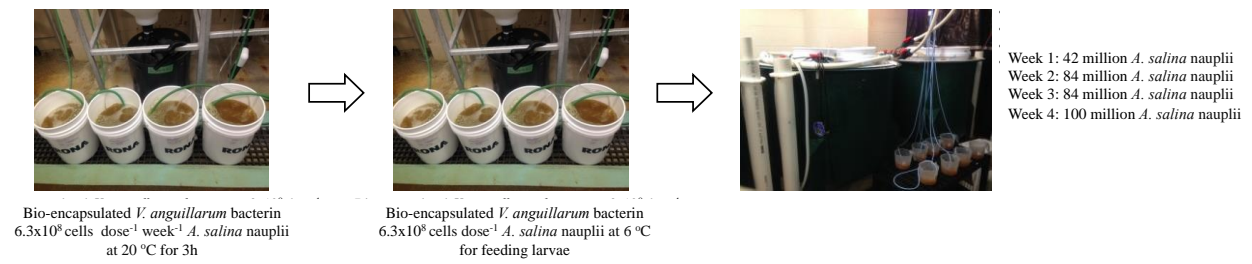

**Figure S4.** *V. anguillarum* bacterin bio-encapsulation in *A. salina* nauplii for industrial application.

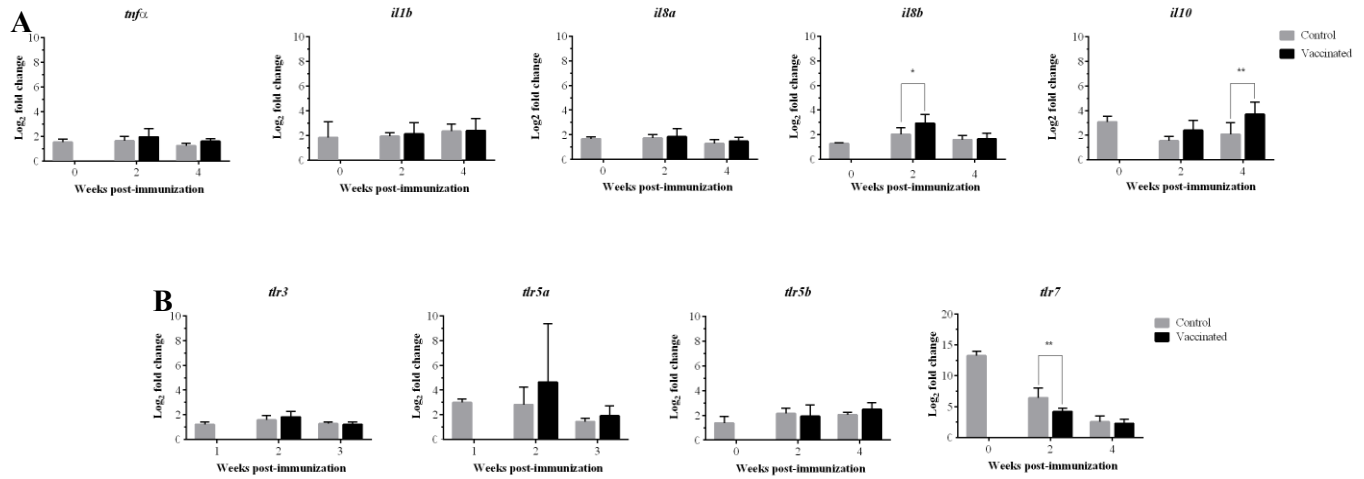

**Figure S5.** Transcript expression levels of cytokines (A) and toll-like receptors (B) in lumpfish larvae orally immunized with the *V. anguillarum* bacterin bio-encapsulated in *A. salina* nauplii. Transcript expression levels were assessed pre-immunization (n= 3 pools of 10 larvae each), and at 2 weeks (n= 3 pools of 10 larvae each) and 4 weeks (n= 3 pools of 5 larvae each) post-immunization in both mock-orally (control) and orally immunized (vaccinated) larvae. Relative expression was calculated using the RQ values. A two-way ANOVA test, followed by Sidak multiple comparisons post hoc test was used to assess significant differences between the treatments (control and vaccinated) at each time point. Asterisks (\*) represent significant differences (\* $p$ < 0.05, \*\* $p$ < 0.01, \*\*\* $p$ < 0.001).

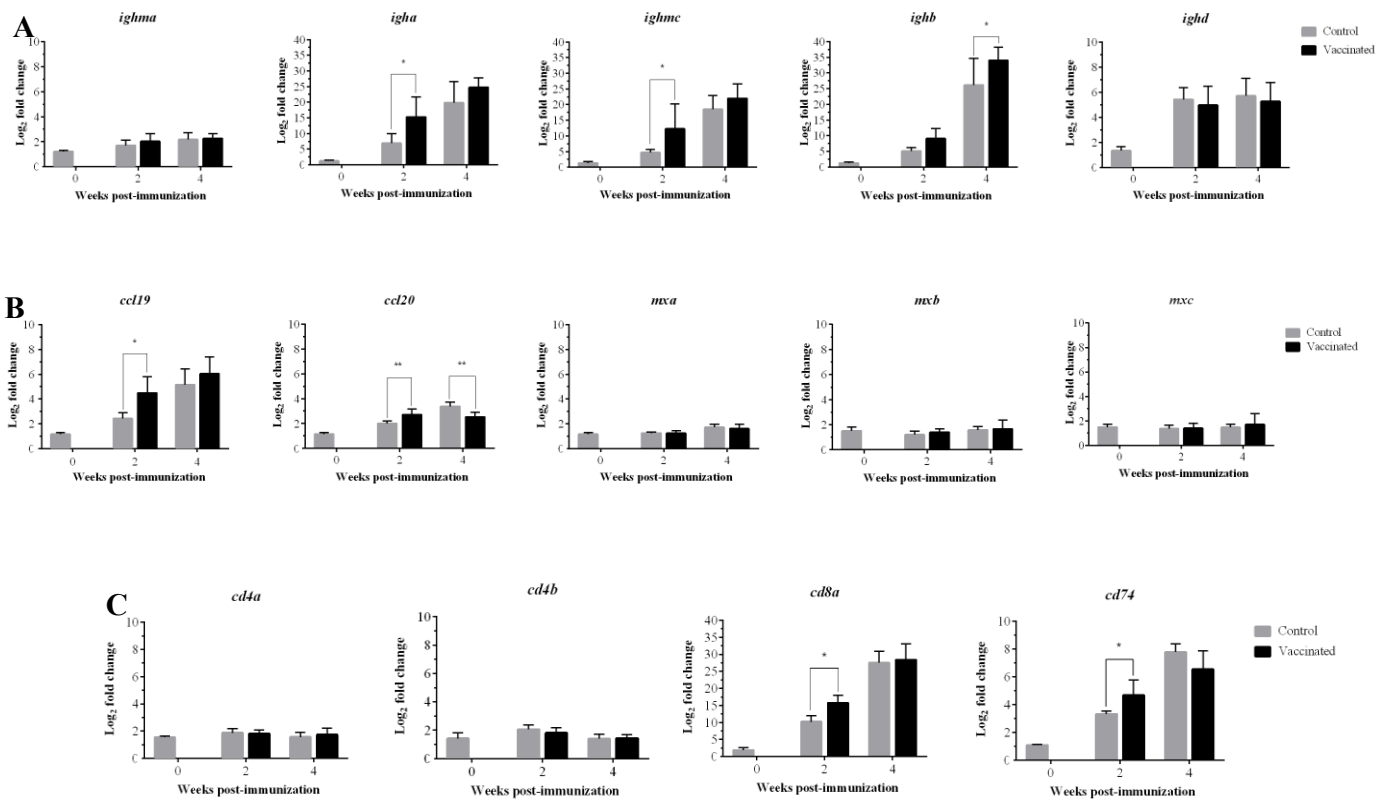

**Figure S6.** Transcript expression levels of immunoglobulin heavy locus genes (A), cytokine CC genes and interferon-induced GTP-binding proteins (B) and cluster of differentiation genes (C) in lumpfish larvae orally immunized with the *V. anguillarum* bacterin bio-encapsulated in *A. salina* nauplii. Transcript expression levels were assessed pre-immunization (n= 3 pools of 10 larvae each), and at 2 weeks (n= 3 pools of 10 larvae each) and 4 weeks (n= 3 pools of 5 larvae each) post-immunization in both mock-orally (control) and orally immunized (vaccinated) larvae. Relative expression was calculated using the RQ values. A two-way ANOVA test, followed by Sidak multiple comparisons post hoc test was used to assess significant differences between the treatments (control and vaccinated) at each time point. Asterisks (\*) represent significant differences (\* $p < 0.05$ , \*\* $p < 0.01$ , \*\*\* $p < 0.001$ ).

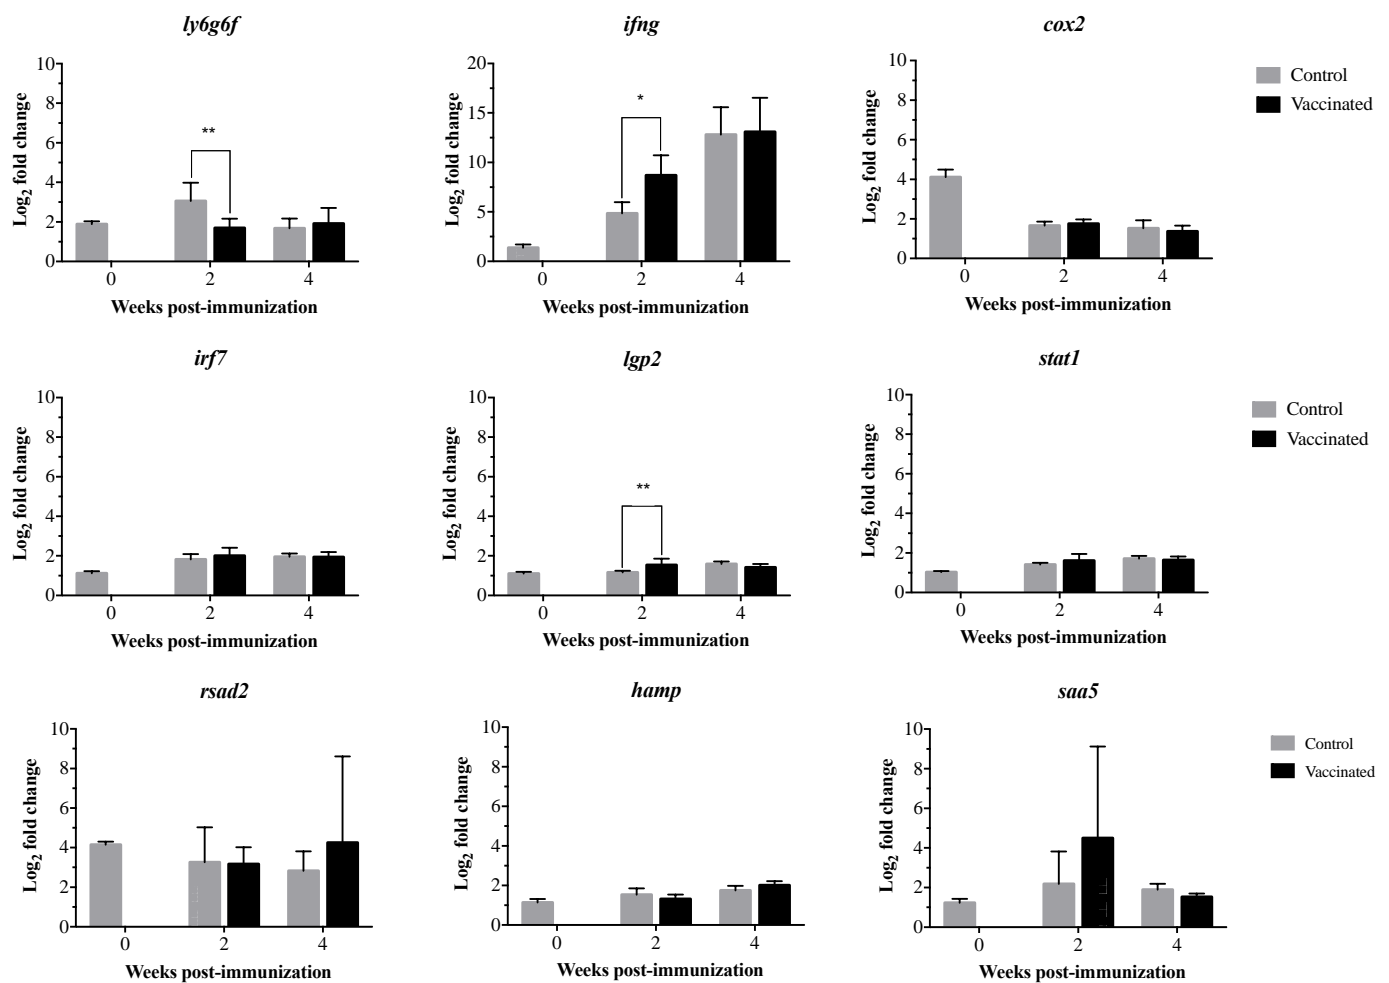

**Figure S7.** Transcript expression levels of other immune-related genes in lumpfish larvae orally immunized with the *V. anguillarum* bacterin bio-encapsulated in *A. salina* nauplii. Transcript expression levels were assessed ( $n=3$  pools of 10 larvae each), and at 2 weeks ( $n=3$  pools of 10 larvae each) and 4 weeks ( $n=3$  pools of 5 larvae each) post-immunization in both mock-orally (control) and orally immunized (vaccinated) larvae. Relative expression was calculated using the RQ values. A two-way ANOVA test, followed by Sidak multiple comparisons post hoc test was used to assess significant differences between the treatments (control and vaccinated) at each time point. Asterisks (\*) represent significant differences (\* $p < 0.05$ , \*\* $p < 0.01$ , \*\*\* $p < 0.001$ ).
